# Supplementary material for: A colloidal ZnTe quantum dot-based photocathode with a metal–insulator–semiconductor structure towards solar-driven CO2 reduction to tunable syngas
Source: Royal Society of Chemistry journal article supplement (doi:10.1039/d0ta10394b), 2020-12-23
Supplement: d0ta10394b1.pdf [file d0ta10394b1.pdf]

## Electronic Supplementary Information

**Colloidal ZnTe quantum dots-based photocathode with metal-insulator-semiconductor structure towards solar-driven CO<sub>2</sub> reduction to tunable syngas**

Peng Wen,<sup>a‡</sup> Hui Li,<sup>b‡</sup> Xiao Ma,<sup>b</sup> Renbo Lei,<sup>c</sup> Xinwei Wang,<sup>c</sup> Scott M Geyer<sup>b\*</sup> and Yejun Qiu<sup>a\*</sup>

<sup>a</sup>Shenzhen Engineering Lab of Flexible Transparent Conductive Films, School of Materials Science and Engineering, Harbin Institute of Technology, Shenzhen, 518055, P. R. China

<sup>b</sup>Department of Chemistry, Wake Forest University, Winston-Salem, North Carolina 27109, United States

<sup>c</sup>School of Advanced Materials, Shenzhen Graduate School, Peking University, Shenzhen 518055, P. R. China

### **\*Corresponding Author**

E-mail: [yejunqiu@hit.edu.cn](mailto:yejunqiu@hit.edu.cn) E-mail: [geyersm@wfu.edu](mailto:geyersm@wfu.edu)

<sup>‡</sup>These authors contributed equally to this work.

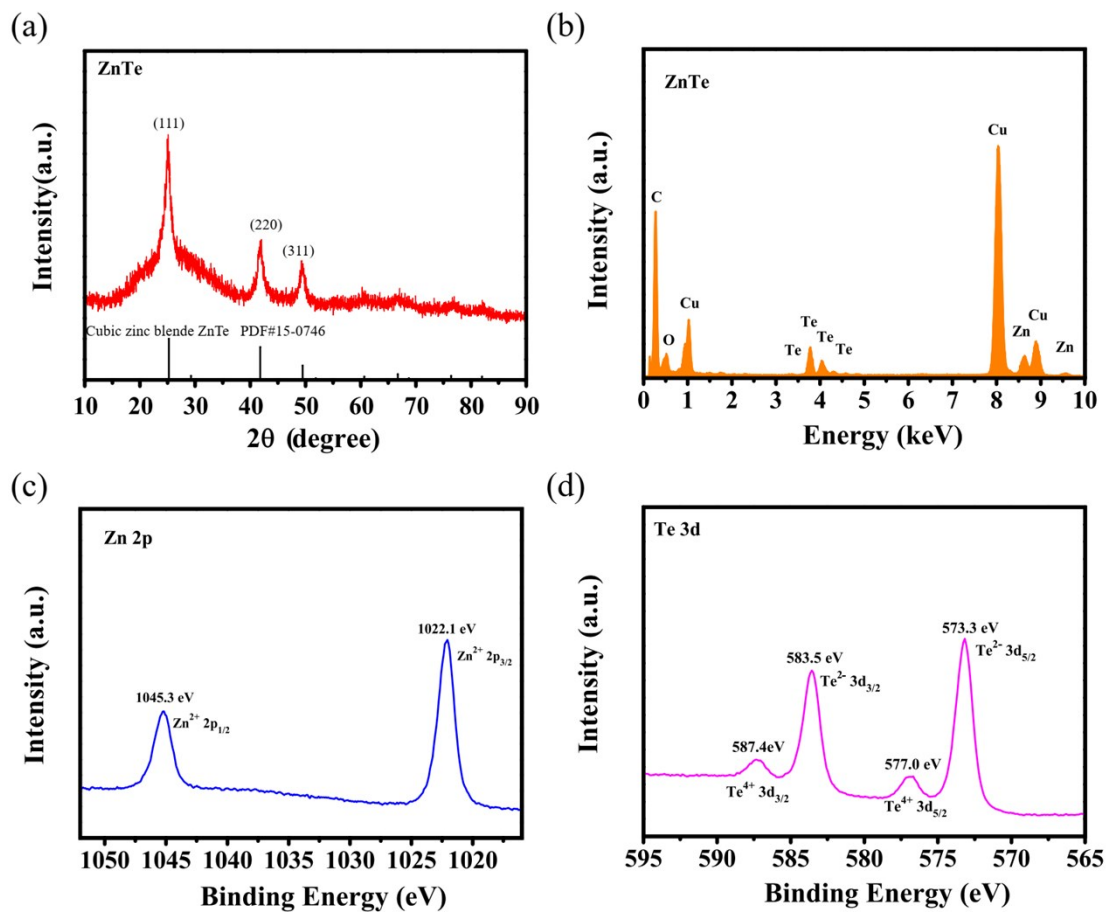

**Fig. S1** (a) XRD pattern, (b) EDX spectrum of ZnTe QDs on TEM copper grid, XPS spectra of (c) Zn 2p and (d) Te 3d for the ZnTe QDs.

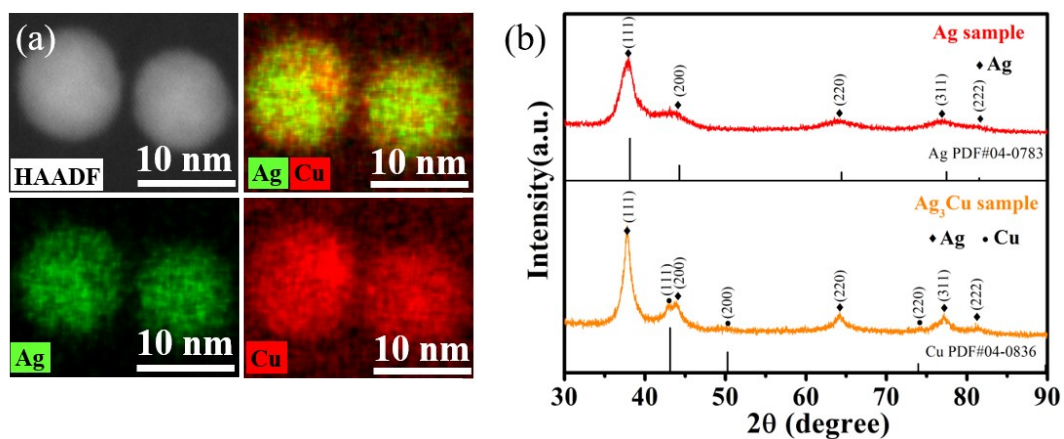

**Fig. S2** (a) HAADF-STEM and corresponding EELS mapping of  $\text{Ag}_3\text{Cu}$  NCs, (b) XRD

patterns of Ag<sub>3</sub>Cu and Ag NCs.

**Table S1**

Elemental composition of Ag and Cu in colloidal Ag<sub>3</sub>Cu NCs.

| Sample             | Weight% (ICP-MS) |      | Atomic ratio (ICP-MS) |
|--------------------|------------------|------|-----------------------|
|                    | Ag               | Cu   | Ag : Cu               |
| Ag <sub>3</sub> Cu | 78.8             | 15.1 | 3.07                  |

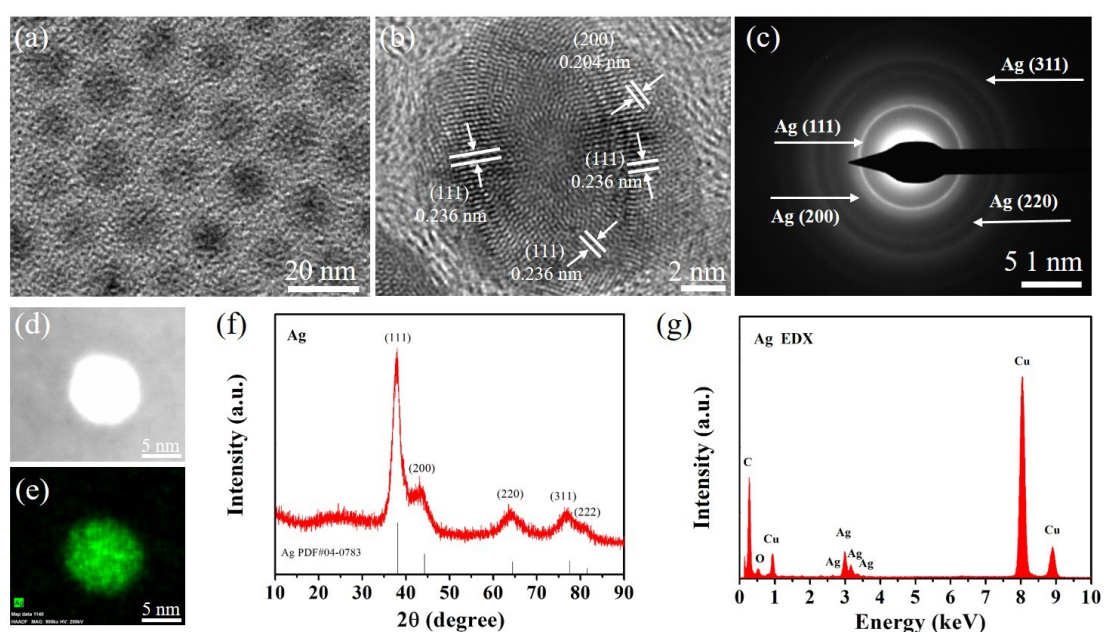

**Fig. S3** (a) TEM image, (b) HRTEM image, (c) corresponding SAED pattern, (d) HAADF-STEM, (e) corresponding EELS-elemental mapping image, (f) XRD pattern and (g) EDX spectrum of Ag NCs.

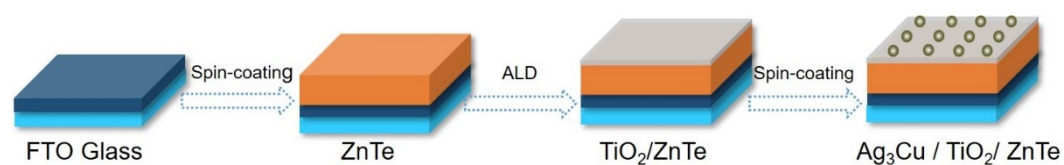

**Fig. S4** Schematic of the fabrication procedures of the Ag<sub>3</sub>Cu/TiO<sub>2</sub>/ZnTe MIS

photocathode.

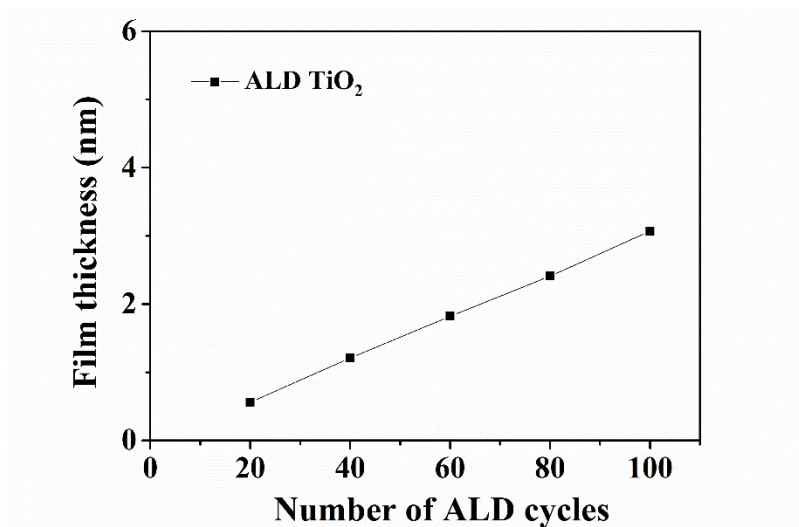

**Fig. S5** Thickness of ALD-deposited TiO<sub>2</sub> film determined by ellipsometry results.

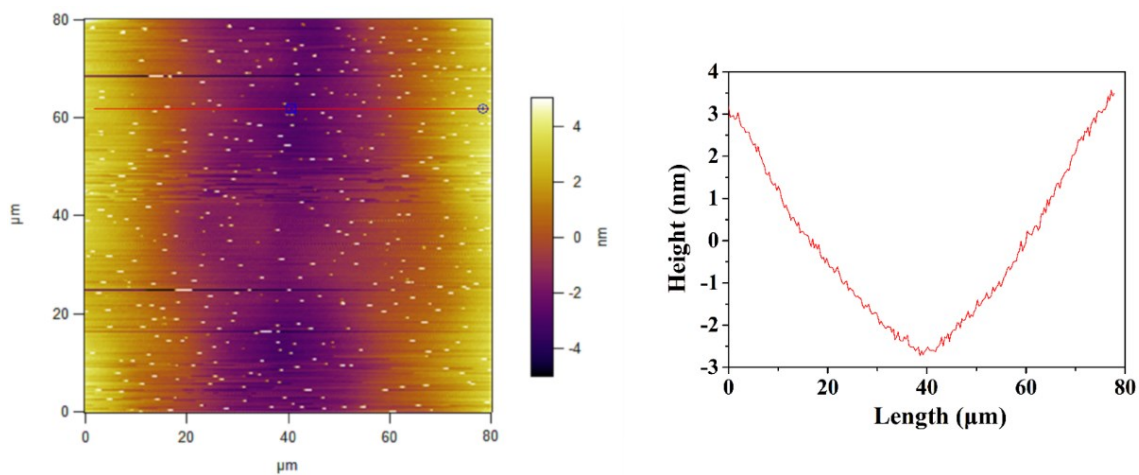

**Fig. S6** AFM image of ALD-deposited TiO<sub>2</sub> film on SiO<sub>2</sub>/Si substrate.

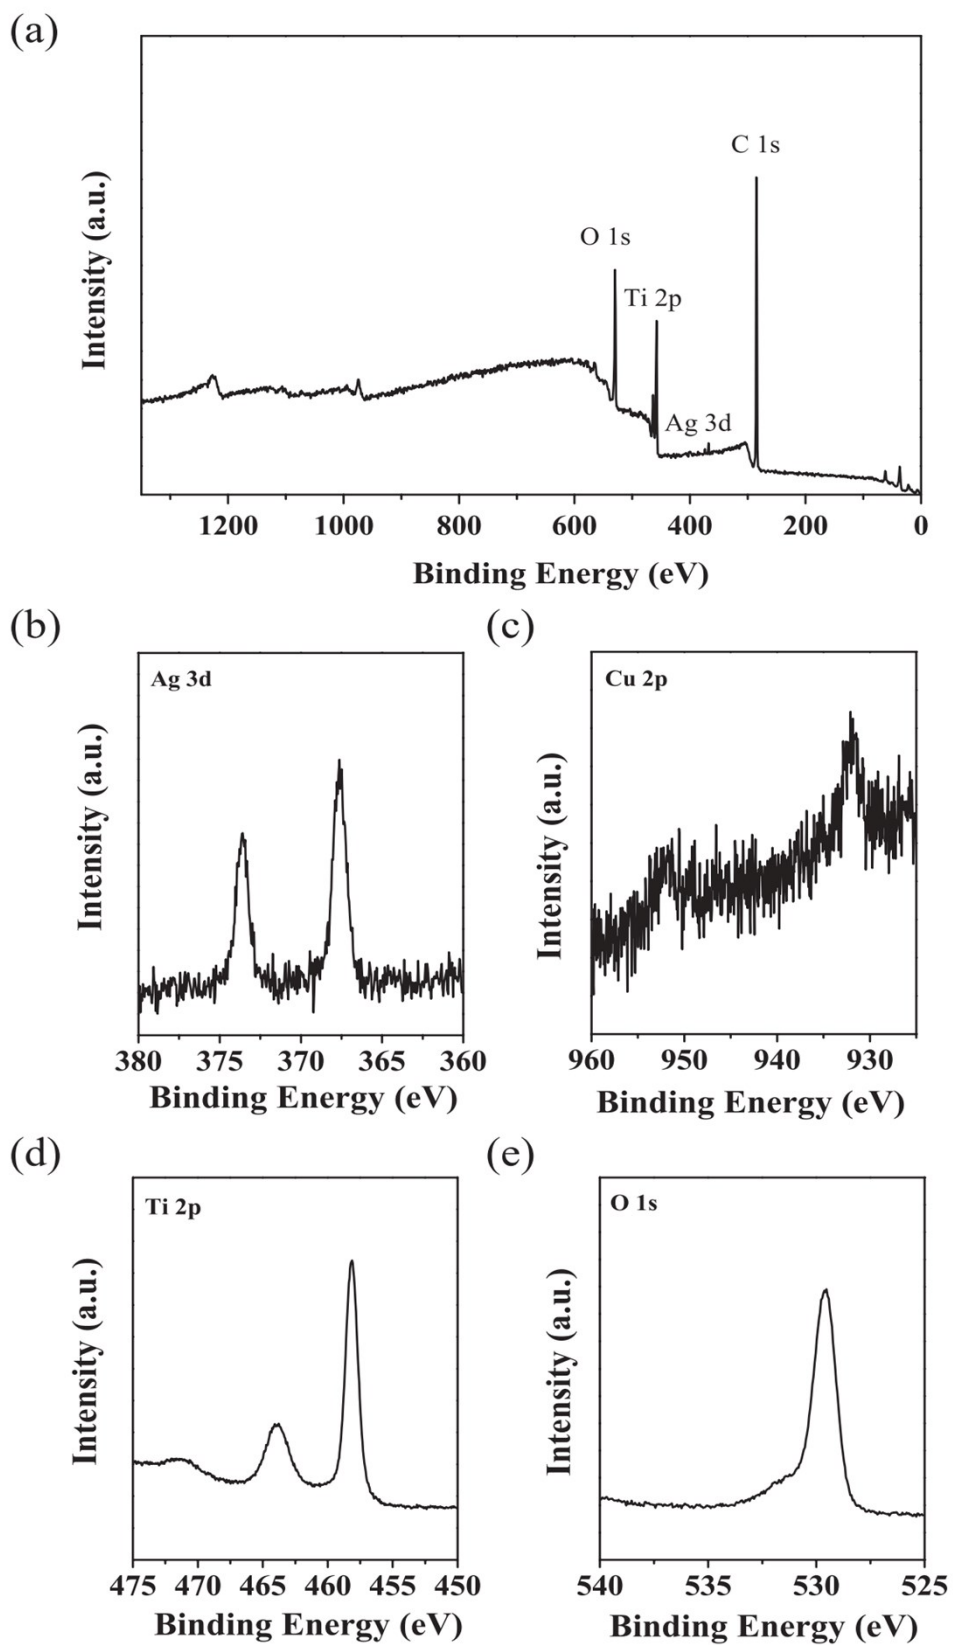

**Fig. S7** XPS spectra of  $\text{Ag}_3\text{Cu}/\text{TiO}_2/\text{ZnTe}$  sample. (a) XPS survey spectrum and high-resolution XPS spectra of (b) Ag 3d, (c) Cu 2p, (d) Ti 2p and (e) O 1s.

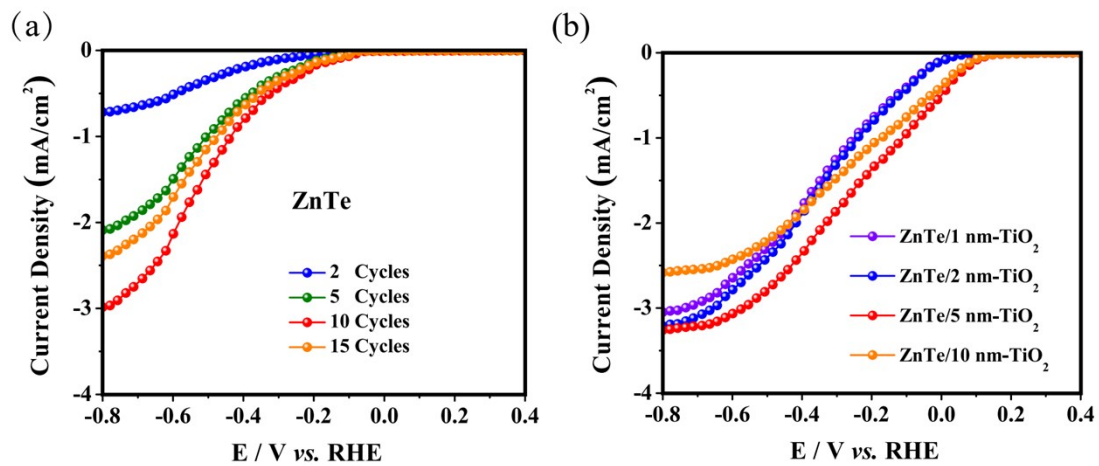

**Fig. S8** PEC  $J-V$  curves of (a) bare ZnTe photocathodes with different spin-coating cycles and (b) TiO<sub>2</sub>/ZnTe-based photocathodes with different covered thickness of TiO<sub>2</sub> in CO<sub>2</sub>-saturated 0.1 M KHCO<sub>3</sub> (pH 6.8) under simulated solar irradiation (AM 1.5G, 100 mW/cm<sup>2</sup>).

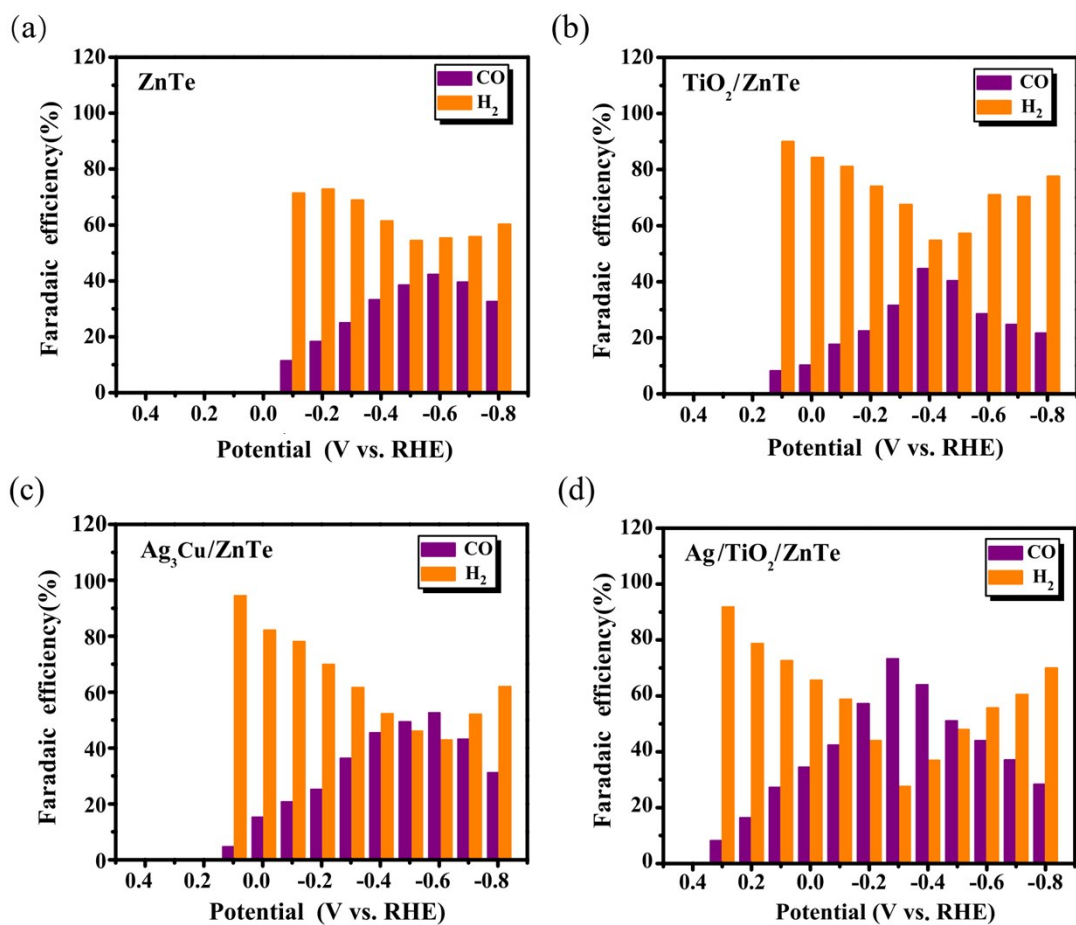

**Fig. S9** Faradaic efficiency toward CO and H<sub>2</sub> for (a) ZnTe, (b) TiO<sub>2</sub>/ZnTe, (c) Ag<sub>3</sub>Cu/ZnTe and (d) Ag/TiO<sub>2</sub>/ZnTe photocathodes in CO<sub>2</sub>-saturated 0.1 M KHCO<sub>3</sub> electrolyte (pH 6.8) under simulated solar illumination (AM 1.5G, 100 mW/cm<sup>2</sup>).



**Table S2.** Comparison of recently reported ZnTe based-photocathodes for PEC CO<sub>2</sub> reduction.

| Photocathode                                 | Electrolyte                   | $E_{\text{onset}}$<br>(V vs. RHE) | $j_{-0.11\text{ V}}$<br>(mA cm <sup>-2</sup> ) | Maximum<br>FE <sub>CO</sub> | Ref.                                      |
|----------------------------------------------|-------------------------------|-----------------------------------|------------------------------------------------|-----------------------------|-------------------------------------------|
| ZnO/ZnTe/CdTe/Au                             | 0.5 M KHCO <sub>3</sub>       | 0.60                              | -3.88                                          | 80%                         | ACS Nano 2016, 10, 6980–6987              |
| Zn/ZnO/ZnTe                                  | 0.5 M KHCO <sub>3</sub>       | -0.20                             | N A                                            | 22.9%                       | Angew. Chem. Int. Ed. 2014, 53, 5852–5857 |
| ZnO/ZnTe/Au                                  | 0.5 M KHCO <sub>3</sub>       | -0.10                             | -3.14                                          | 63.0%                       | Energy Environ. Sci., 2015, 8, 3597–3604  |
| N:C/N:ZnTe                                   | 0.5 M KHCO <sub>3</sub>       | 0.25                              | -1.21                                          | 72.0%                       | Adv. Energy Mater. 2018, 8, 1702636       |
| PPy/ZnTe                                     | 0.1M KHCO <sub>3</sub>        | 0                                 | N A                                            | 13.8%                       | J. Mater. Chem. A, 2015, 3, 1089–1095     |
| <b>Ag<sub>3</sub>Cu/TiO<sub>2</sub>/ZnTe</b> | <b>0.1 M KHCO<sub>3</sub></b> | <b>0.40</b>                       | <b>-3.81</b>                                   | <b>86.5%</b>                | <b>This work</b>                          |

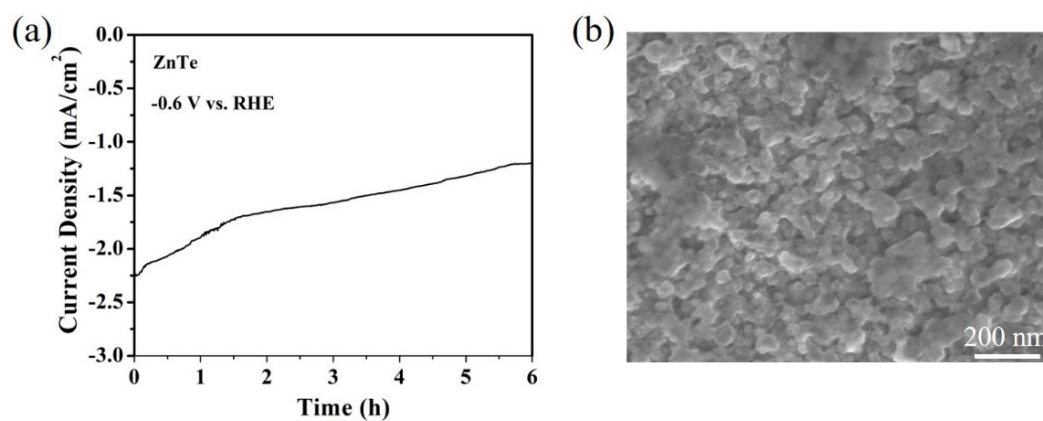

**Fig. S10** (a) Time-dependent photocurrents ZnTe photocathode at potential of -0.6 V versus RHE in CO<sub>2</sub>-saturated 0.1 M KHCO<sub>3</sub> under simulated solar irradiation and (b) SEM image of ZnTe photocathode after stability measurement.



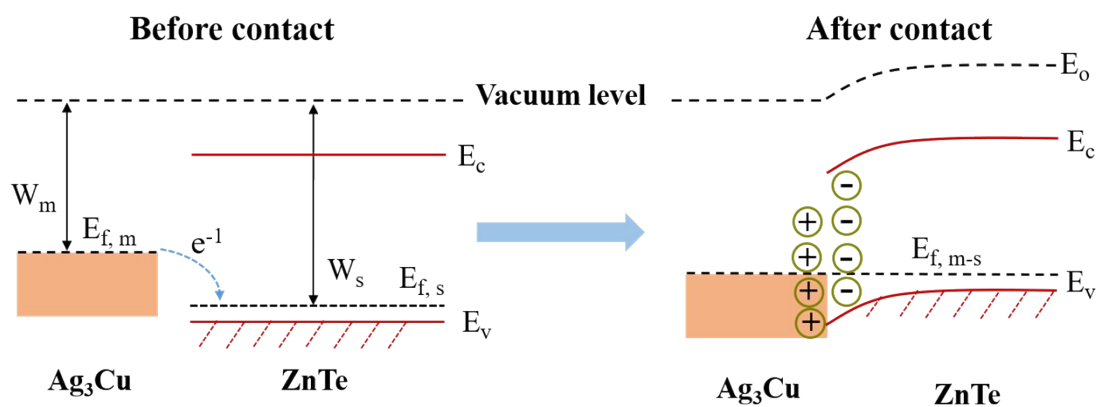

**Fig. S11** Schematic diagram of band structure configuration of Ag<sub>3</sub>Cu and ZnTe before and after contact.

**Table S3**

The values of key parameters in Figure 4a, where  $E_c$ ,  $E_v$ ,  $E_{f,s}$ ,  $E_{f,metal}$  and  $E_{reaction}$  are the conduction band, valence band, Fermi level of ZnTe, Fermi level of metal, and the potential values of the chemical reactions ( $E_{H^+/H_2}$  and  $E_{CO_2/CO}$ ) respectively.

| Parameters         | $E_{f, Ag_3Cu}$ | $E_{f, Ag}$ | $E_C$ | $E_V$ | $E_{f, s}$ | $E_{H^+/H_2}$ | $E_{CO_2/CO}$ |
|--------------------|-----------------|-------------|-------|-------|------------|---------------|---------------|
| $E_{vac}$ (eV)     | -4.37           | -4.28       | -2.94 | -5.23 | -4.80      | -4.5          | -4.39         |
| $E_{NHE}$ (V) pH=0 | -0.13           | -0.22       | -1.56 | 0.73  | 0.30       | 0.00          | -0.11         |

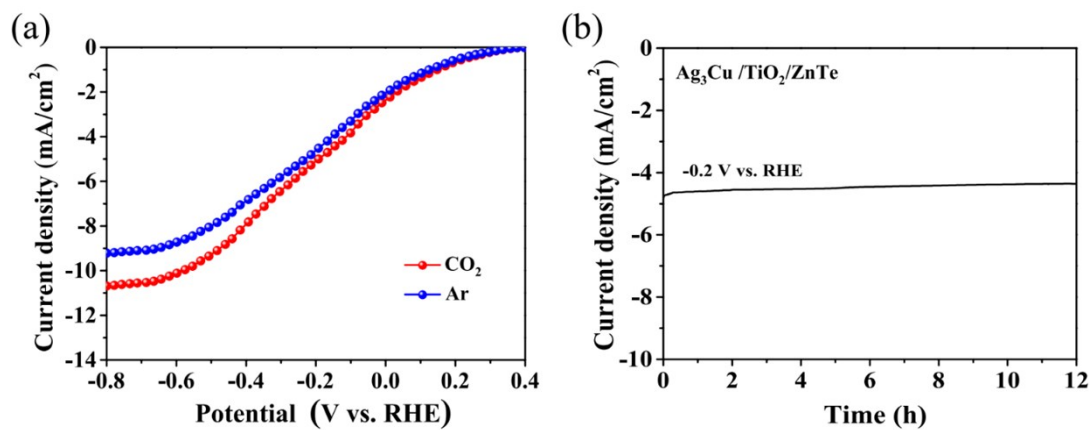

**Fig. S12** (a) J-V curves of Ag<sub>3</sub>Cu/TiO<sub>2</sub>/ZnTe photocathode in CO<sub>2</sub> and Ar-saturated 0.1 M KHCO<sub>3</sub> under simulated solar irradiation, (b) Time-dependent photocurrent of Ag<sub>3</sub>Cu/TiO<sub>2</sub>/ZnTe photocathode at potential of -0.2 V vs. RHE in Ar-saturated 0.1 M KHCO<sub>3</sub> under simulated solar irradiation.
